# Supplementary material for: Coating single-walled carbon nanotubes with cadmium chalcogenides
Source: Royal Society of Chemistry journal article supplement (doi:10.1039/b510255c), 2005-01-01
Supplement: b510255c.pdf [file b510255c.pdf]

Supplementary material (ESI) for Journal of Materials Chemistry

This journal is © The Royal Society of Chemistry 2005

# **Coating Single-Walled Carbon Nanotubes with Cadmium Chalcogenides**

Ryan Loscutova and Andrew R. Barron\*

Department of Chemistry and Center for Nanoscale Science and Technology, Rice University,

Houston, Texas 77005, USA

Supplementary Materials

Supplementary material (ESI) for Journal of Materials Chemistry

This journal is © The Royal Society of Chemistry 2005

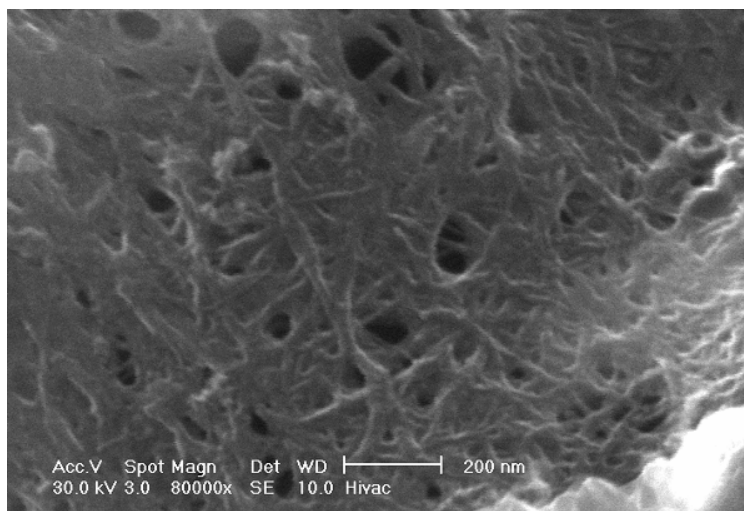

**Fig. S1.** SEM images of CdSe-SWNT deposited from TOPO solution after 30 min. showing the formation of CdSe particles (bright area in the lower right of the image).

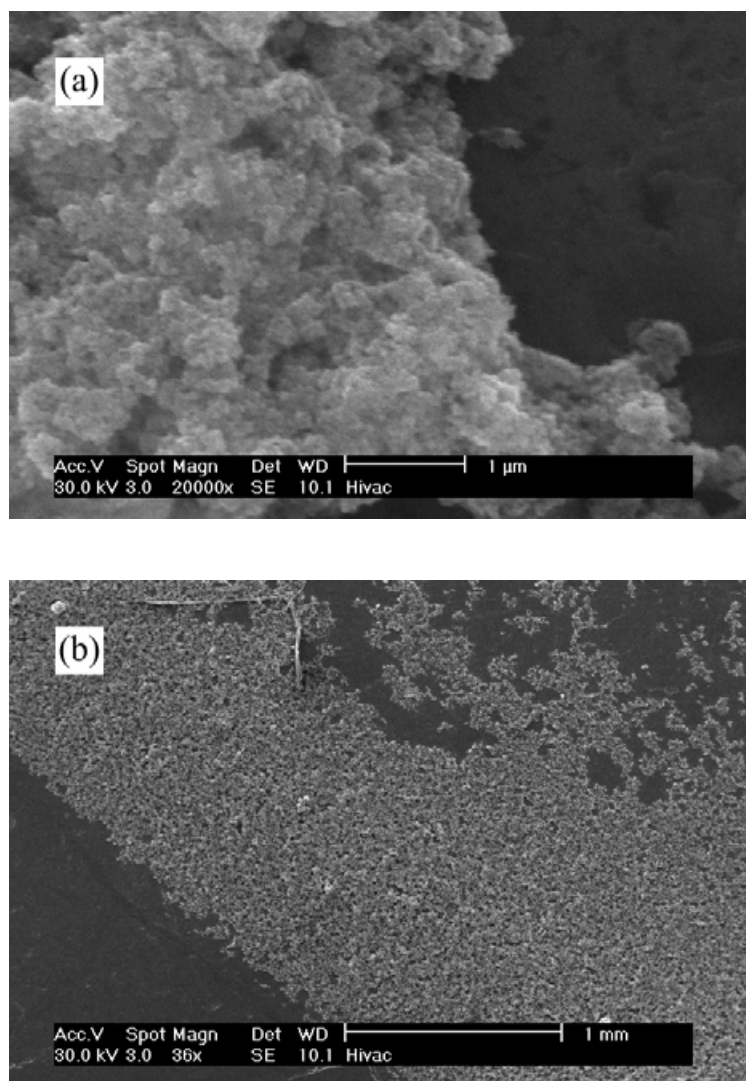

**Fig. S2.** SEM images of coated SWNTs in ODE solvent, showing the formation of ca. 0.1  $\mu$ m colloids of CdSe, and virtually no SWNTs exposed.

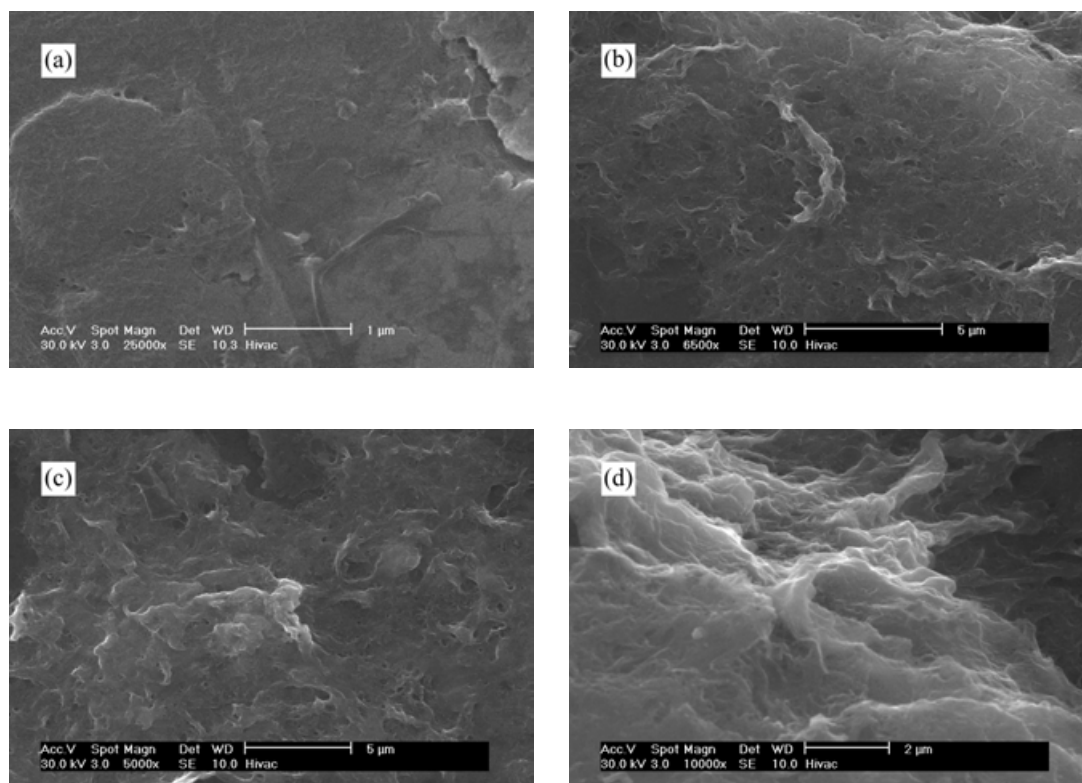

**Fig. S3.** SEM images of (a) uncoated SWNT mat, and coated SWNT composites at (b) 10 min., (c) 30 min., and (d) 1 hr., illustrating differences of image contrast when coatings are present.

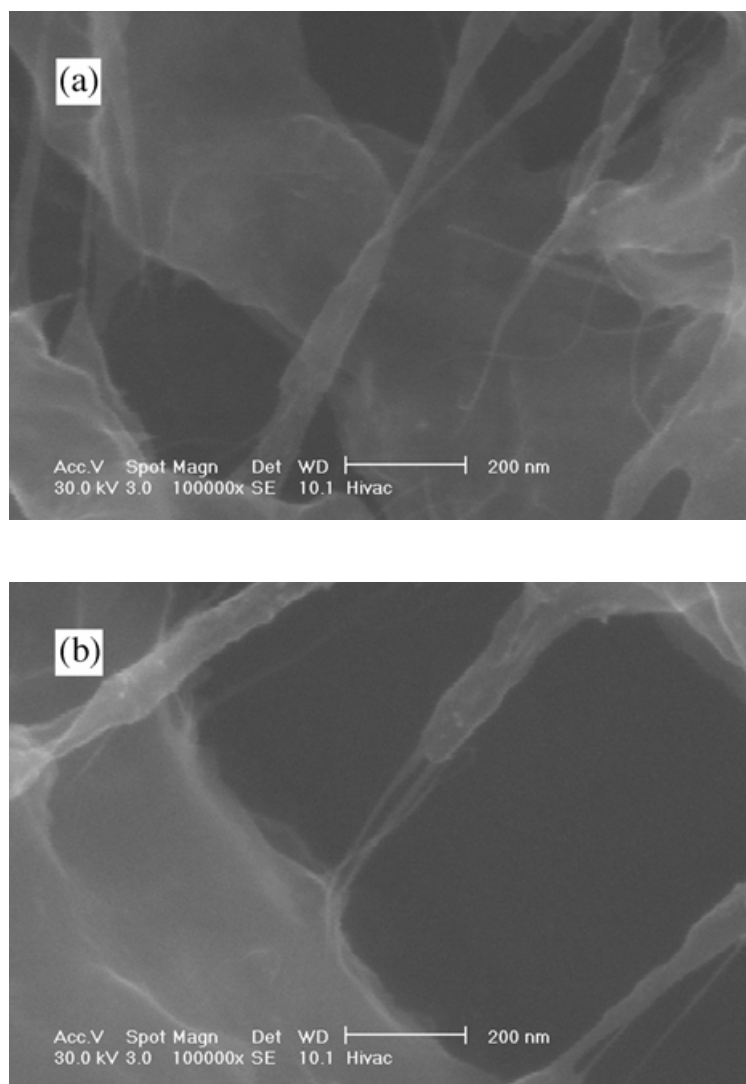

**Fig. S4.** SEM images of CdSe-SWNT composites formed in ODE solution: [SWNT] = 0.1 mg.mL<sup>-1</sup> and Cd:SWNT ratio = 107.

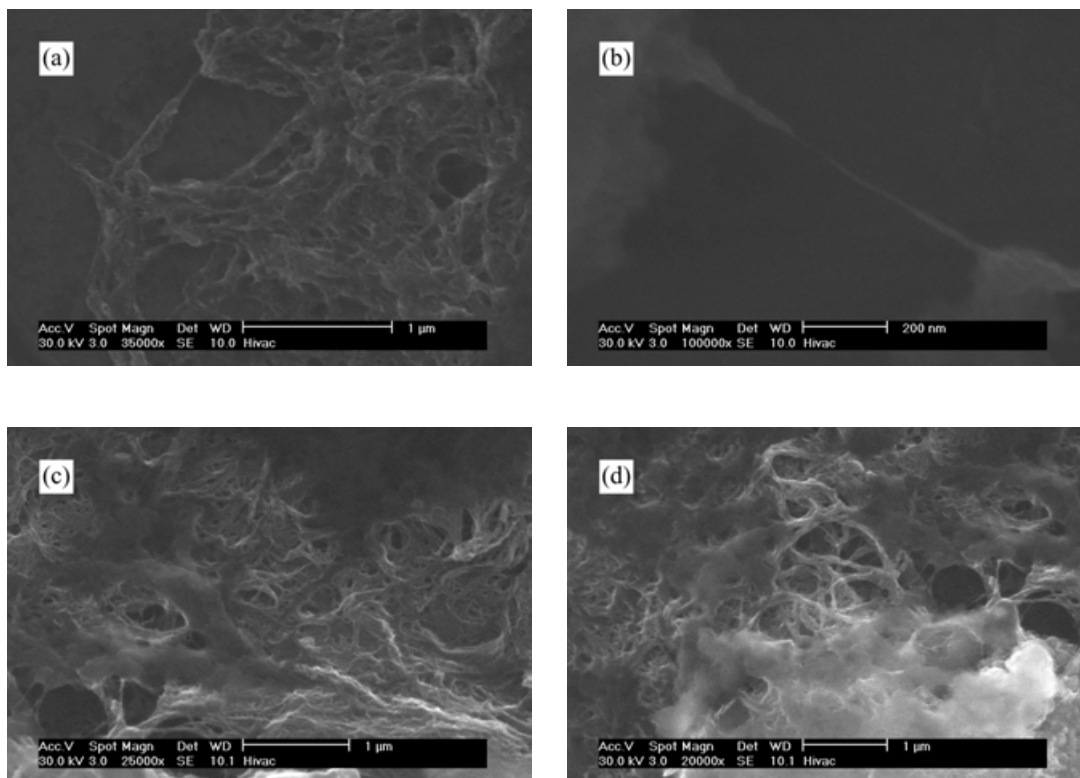

**Fig. S5.** SEM images of SWNTs aliquots taken at 5 min (a and b), 10 min (c), and overnight (d) for the CdSe coating of SWNTs in ODE solution:  $[\text{SWNT}] = 0.1 \text{ mg.mL}^{-1}$  and Cd:SWNT ratio = 107.

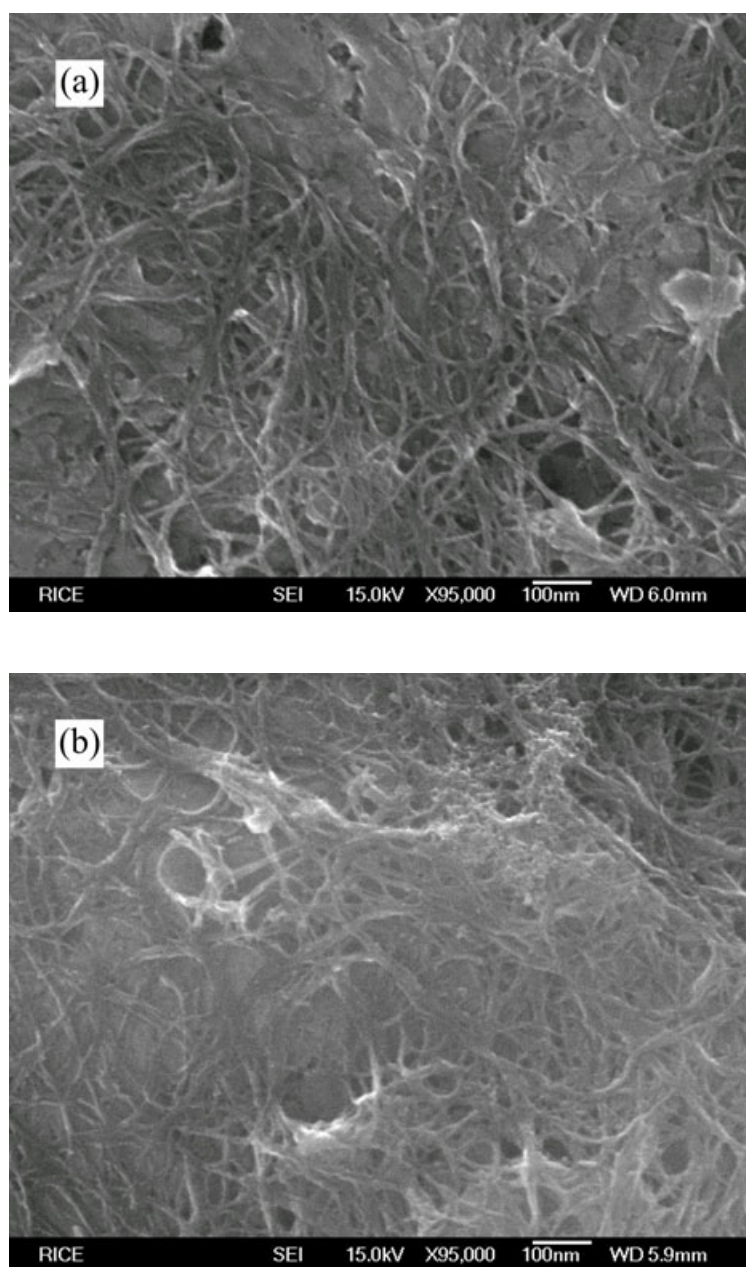

**Fig. S6.** SEM images of SWNTs coated with CdSe at 75  $\mu\text{M}$  (a) and 50  $\mu\text{M}$  (b) conditions.

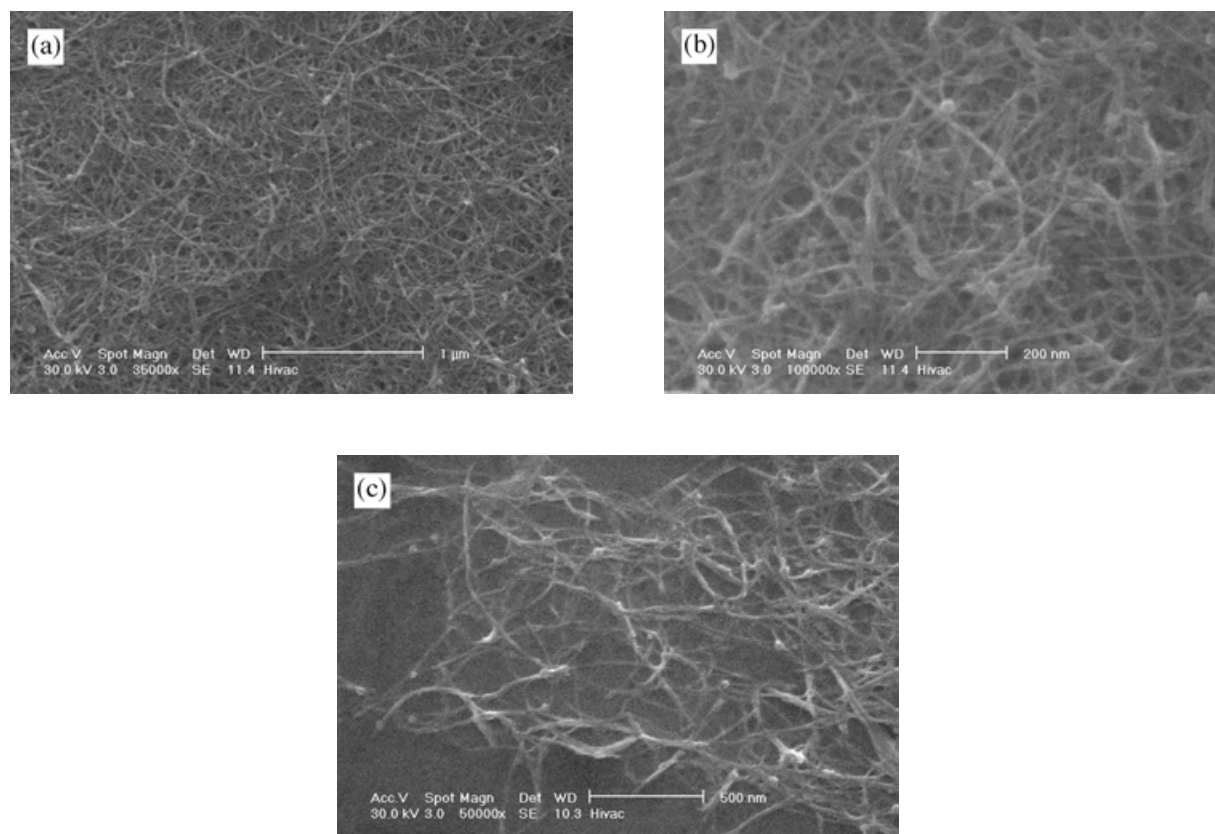

**Fig. S7.** SEM images of aqueous decants of SWNTs surfactant with 1% SDS, coated with CdS at 1 mM bath concentrations.



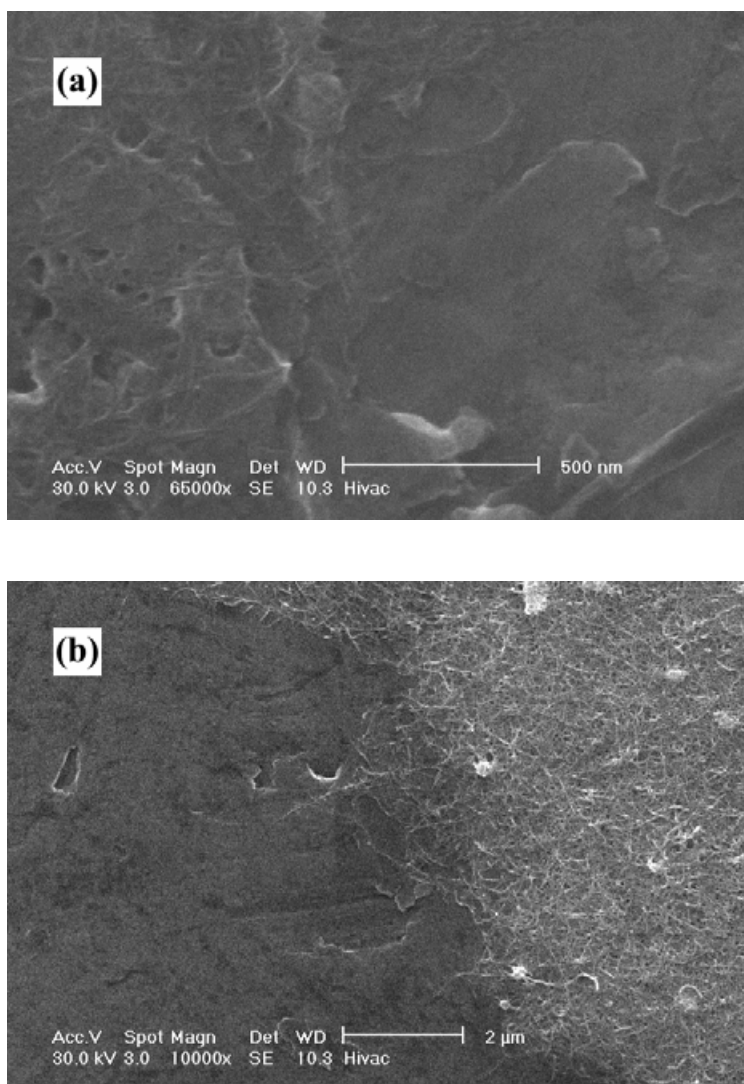

**Fig. S8.** Comparison of SEM images (not sputter coated with any contrast-enhancing conductor) showing the difference of contrast between (a) an uncoated SWNT mat and (b) CdS SWNTs coated at 1 mM bath conditions. Note that one-half of each image frame contains no SWNTs, to standardize the comparison.

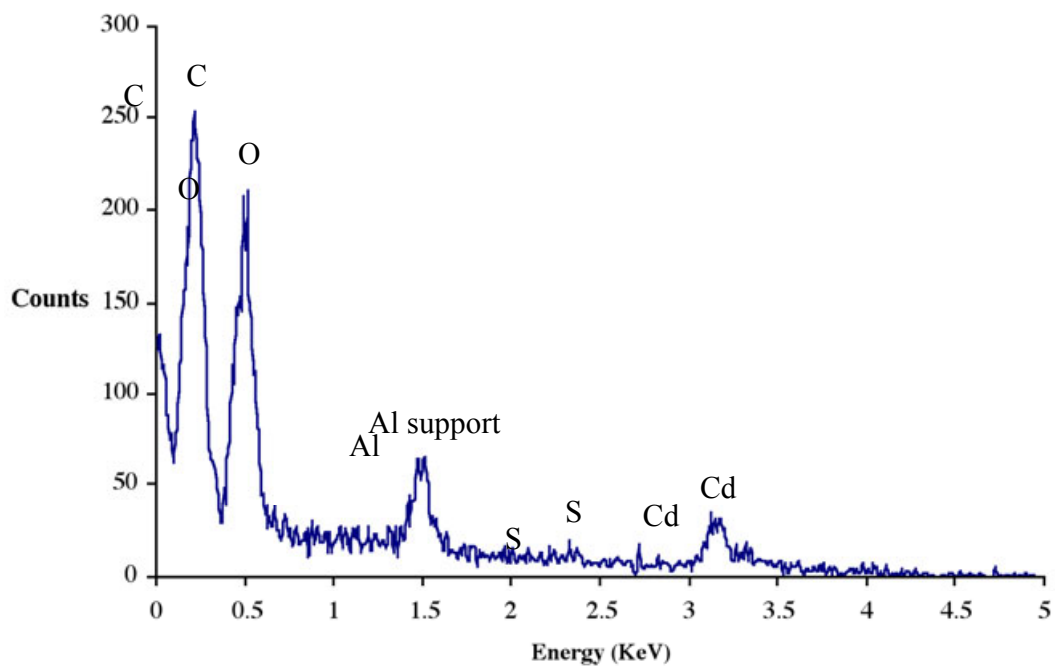

**Fig. S9.** EDX spectra of CdS coated SWNTs coated at 1 mM bath conditions (sample 14).  
Collected at an accelerating voltage of 5 KV.

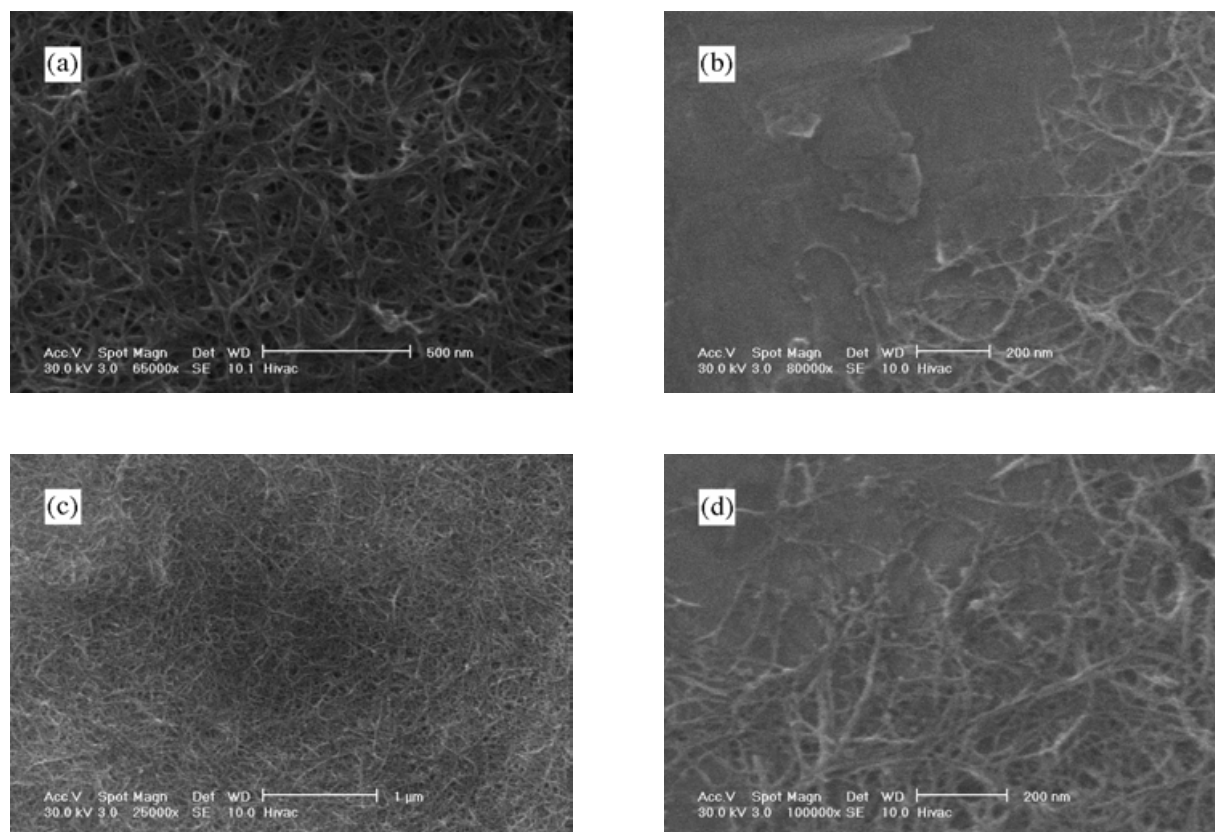

**Fig. S10.** SEM images of SWNTs coated with CdS at (a) 1.5 mM, (b) 0.8 mM, and (c and d) 0.5 mM bath concentrations.

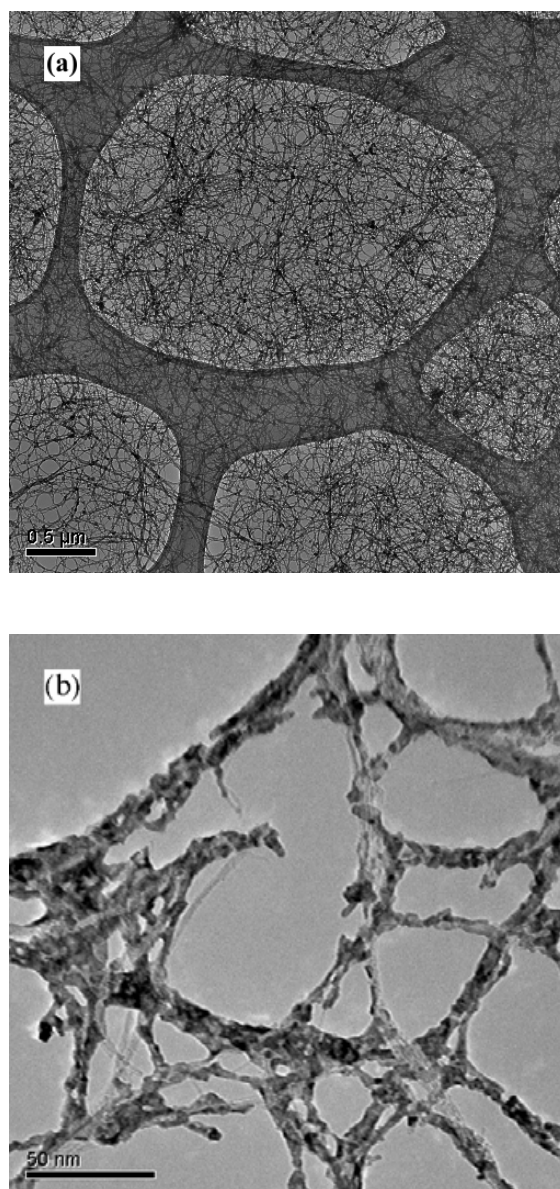

**Fig. S11.** TEM images of CdS coated SWNTs at 1 mM bath conditions.

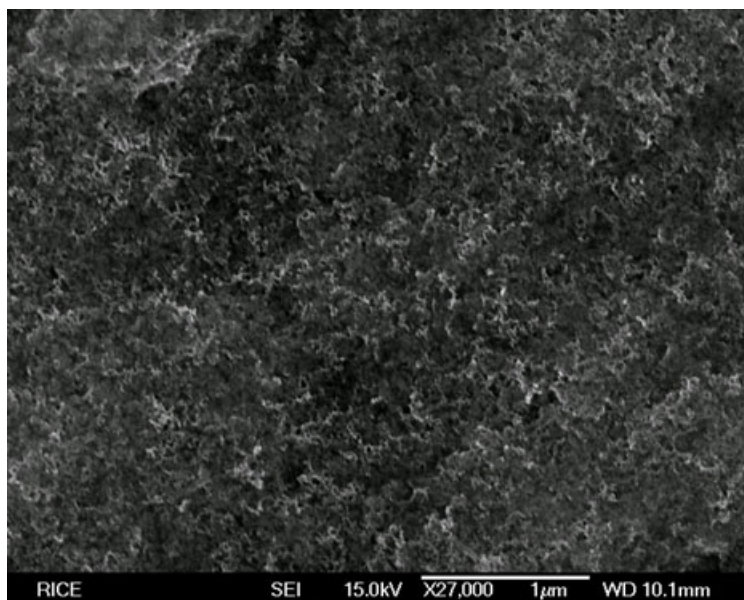

**Fig. S12.** SEM image of unsurfacted CdS precipitate, as deposited from the 1 mM CdS deposition baths. When 1% SDS surfactant is present, no CdS precipitate is detected.

Supplementary material (ESI) for Journal of Materials Chemistry

This journal is © The Royal Society of Chemistry 2005

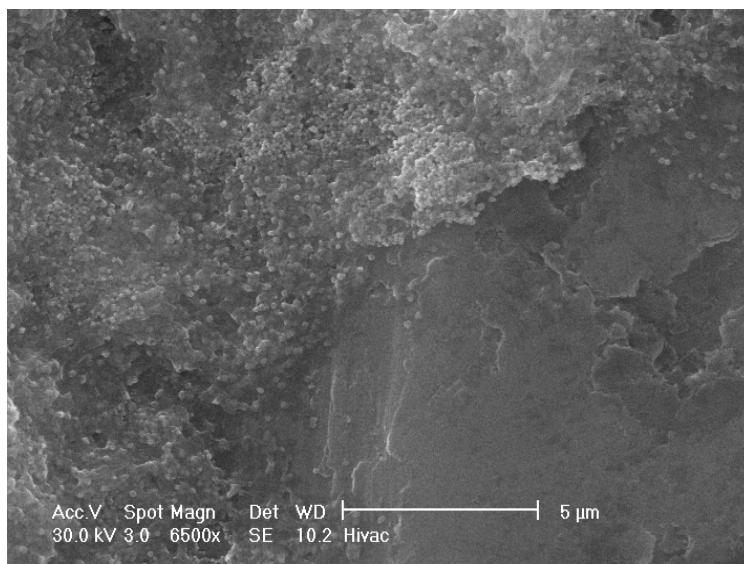

**Fig. S13.** SEM images showing 10 mM CdS bath concentrations. Note the presence of colloidal deposit on the CdS-SWNTs.

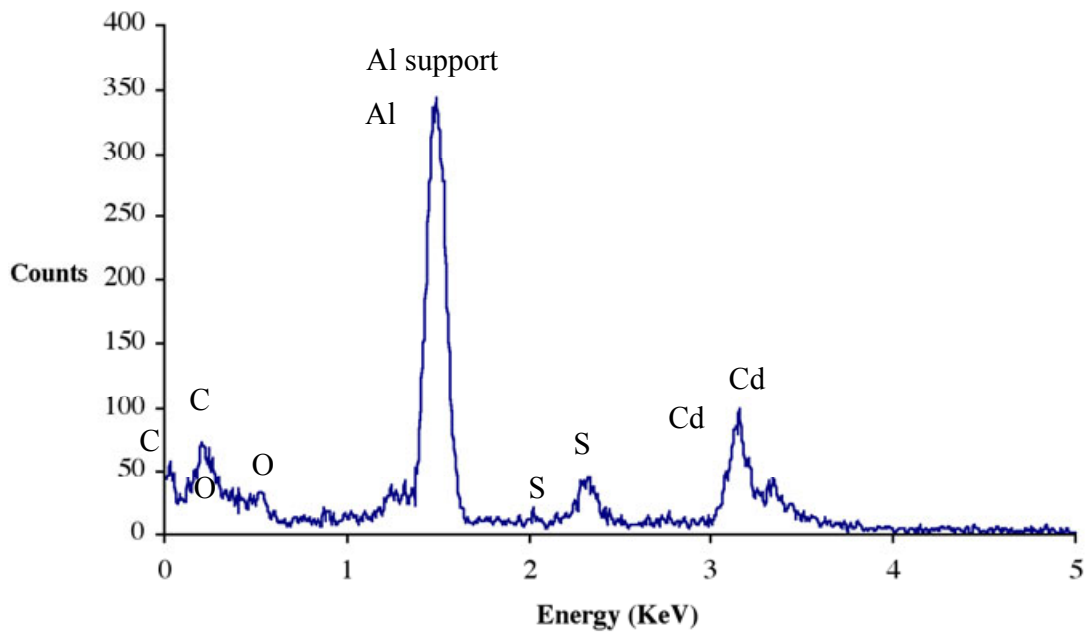

**Fig. S14.** EDX spectra of CdS coated SWNTs coated at 10 mM bath conditions. Collected at an accelerating voltage of 10 KV.
